# Supplementary material for: GrowMatch: An Automated Method for Reconciling In Silico/In Vivo Growth Predictions
Source: PLoS Comput Biol. 2009 Mar 13;5(3):e1000308. doi: 10.1371/journal.pcbi.1000308 (PMC2645679; doi:10.1371/journal.pcbi.1000308)
Supplement: Table S3 — BLAST scores and expression data for complementary and non-complementary isozymes (0.05 MB XLS) [file pcbi.1000308.s003.xls]

## Sheet: Non-Complementary isozymes
		% identity	Alignment length	E- Value	BLAST score
metL	thrA	30.78	848	9e-100	348
ddlB	ddlA	34.7	366	1e-53	192
ilvA	tdcB	38.86	332	5e-56	201
ilvA	mrcA	100	13	0.002	27.7
ftsI	mrdA	26.06	660	4e-39	145
can	cynT	34.6	211	9e-21	82
aroE	ydiB	30.59	304	4e-23	90.5
fabZ	fabA	30.68	176	3e-13	56.2
fabZ	mrcB	87.5	16	0.0002	29.3
glnA	puuA	26.46	446	1e-25	100
glnA	mrcA	100	13	0.002	27.7
glnA	mrcB	92.86	14	0.001	28.1
metC	tnaA	82.35	17	0.0004	28.5
metC	sdaA	46.81	47	1e-05	33.5
metE	metH	92.86	14	0.003	28.1
folA	folM	100	13	0.0002	27.7
folA	sdaB	93.75	16	3e-05	31.2
folA	malY	66.67	24	0.0002	28.1
ubiD	ubiX	100	13	0.0004	27.7
yshA	ompN	88.24	17	5e-05	30.4
yshA	ompF	100	14	9e-05	29.6
yshA	ompC	100	14	9e-05	29.6
yshA	phoE	43.64	55	8e-06	33.1
yshA	ompG	24.66	219	7e-09	43.1
yshA	ompA	100	15	2e-05	31.6
*Genes highlighted in bold are associated with GNG mutants

## Sheet: Complementary Isozymes
		% identity	Alignment length	E- Value	BLAST score
folA	folM	100	13	0.0002	27.7
acnB	acnA	30.58	121	2e-05	35.4
cynT	can	34.6	211	2e-27	104
ddlA	ddlB	24.7	366	1e-53	192
panE	ilvC	100	13	0.0006	27.7
adk	ndk	93.33	15	6e-05	28.9
cmk	pyrH	50	42	4e-05	30
acnA	acnB	23.27	391	3e-05	34.3
clcB	clcA	30.99	142	4e-14	62
malY	metC	93.33	15	0.0002	29.3
nudB	mutT	41.03	78	6e-11	48.1
fabB	fabF	39.77	430	9e-70	246
cysM	cysK	44.07	329	3e-61	217
gutQ	kdsD	46.63	341	3e-75	264
ygiE	corA	100	13	0.0003	27.7
aroE	ydiB	30.59	304	4e-23	90.5
argD	astC	61.07	411	5e-151	516
aroK	aroL	37.64	178	2e-28	107
ilvE	tyrB	75	20	0.0002	28.9
hemX	cysG	100	13	0.0007	27.7
ubiD	ubiX	100	13	0.0004	27.7
glnA	puuA	26.46	446	1e-25	100
metH	metE	92.86	14	0.003	28.1
alr	dadX	43.44	366	2e-78	275
tyrB	aspC	44.25	409	6e-101	350
argI	argF	88.15	346	5e-174	592
lysC	thrA	31.62	487	2e-48	177
lysC	metL	33.55	313	8e-34	128
mrcB	mrcA	34.66	251	4e-34	130
mrcB	ftsI	26.95	256	1e-08	45.4
mrcB	mrdA	100	13	0.002	27.7
mrcA	ftsI	29.13	103	3e-06	37.4
mrcA	mrdA	23.29	146	1e-06	38.5
phoE	ompF	61.27	377	3e-133	457
phoE	ompN	60.77	390	4e-140	479
phoE	ompC	59.64	384	5e-130	446
ompF	ompN	58.1	401	3e-126	433
ompF	ompC	60.41	394	5e-129	442
ompN	ompC	67.76	397	1e-140	481
tyrB	ilvE	75	20	0.0002	28.9
tyrB	aspC	44.25	409	6e-101	350
pbpC	mrcB	27.04	514	5e-35	133
pbpC	mrcA	34.37	323	3e-35	134
mrcB	mrcA	34.66	251	4e-34	130
aroF	aroG	56.06	355	2e-111	384
aroF	aroH	50	358	2e-99	344
aroG	aroH	58.33	360	4e-125	429
bacA	pgpB	100	13	0.0003	27.7
bacA	ybjG	56	25	0.0001	28.9
pgpB	ybjG	32.76	58	2e-07	37.7
tdcB	sdaA	73.68	19	0.0002	29.6
tdcB	sdaB	73.68	19	0.0001	30
tdcB	ilvA	38.86	332	8e-150	180
sdaA	sdaB	77.94	467	0	708
sdaB	ilvA	100	13	0.001	27.7
ompN	ompA	100	14	0.0001	29.6
ompN	ompG	100	14	0.0001	29.6
ompN	ompL	100	14	0.0001	29.6
ompA	ompG	100	15	3e-05	31.6
ompA	ompL	100	15	2e-05	31.6
ompC	ompA	100	14	0.0001	29.6
ompC	ompG	100	14	0.0001	29.6
ompC	ompL	100	14	9e-05	29.6
ompF	ompA	53.66	41	3e-06	35
ompF	ompG	38.96	77	3e-06	35
ompF	ompL	46.34	41	5e-06	33.9
ompG	ompL	26.27	217	3e-10	47.8
phoE	ompA	58.82	34	8e-07	37
phoE	ompG	54.29	35	6e-06	33.9
phoE	ompL	53.33	45	2e-07	38.1
*Genes highlighted in bold are associated with GG mutants

## Sheet: Expression data
mutant gene	CI-	CI+		non-complementary gene	CI-	CI+
ddlB	1661.42	1697.28		ddlA	391.025	475.3
ilvA	883.075	1109.36		tdcB	69.4562	81.3192
				mrcA	870.297	929.747
				mrdA	456.167	486.16
can	4956.2	5465.55		cynT	552.751	606.278
aroE	1145.04	1238.93		ydiB	120.497	159.231
fabZ	3135.99	3298.37		fabA	1628.68	1919.66
				mrcB	1002.28	1054.61
				puuA	1074.54	1350.24
glnA	2107.48	2743.3		puuA	1074.54	1350.24
				mrcA	870.297	929.747
				mrcB	1002.28	1054.61
metC	921.713	1204.24		tnaA	22.9248	67.6216
				sdaA	441.538	514.645
metE	4195.69	5864.12		metH	1239.28	1359.49
folA	854.928	952.154		folM	505.836	729.258
				sdaB	1164.07	1414.27
				malY	238.323	310.004
ubiD	1307.37	1429.76		ubiX	166.795	221.939
yshA	103.982	107.078		ompN	114.476	123.25
				ompF	8423.27	8667.87
				ompC	5703.29	6056.33
				phoE	145.103	150.593
				ompG	174.126	200.546
				ompA	7872.39	9517.01
[CI-, CI+]= 95% Confidence intervals of expression data using data available in Covert et al., (Nature 2004)
